# Supplementary material for: Extensive transmission of microbes along the gastrointestinal tract
Source: eLife journal article supplement (doi:10.7554/elife.42693), 2019-02-11
Supplement: supp [file elife_poa_e42693_Figure_2_figure_supplement_4.pdf › elife_poa_e42693_Figure_2_figure_supplement_4.pdf]

Heatmap showing the relative abundance of 1000 bacterial taxa across 1000 samples. The taxa are listed on the y-axis, and the samples are represented by columns. The color scale ranges from blue (low abundance) to red (high abundance). A legend on the right indicates the color scale for the relative abundance of each taxon.

Legend:

- odds ratio > 1 & p < 0.05
- odds ratio > 1
- odds ratio > 1 & p < 0.05
- odds ratio > 1
- odds ratio < 1 & p < 0.05
- odds ratio < 1

Saliva to stool

Stool to saliva
