# Supplementary material for: Extensive transmission of microbes along the gastrointestinal tract
Source: eLife journal article supplement (doi:10.7554/elife.42693), 2019-02-11

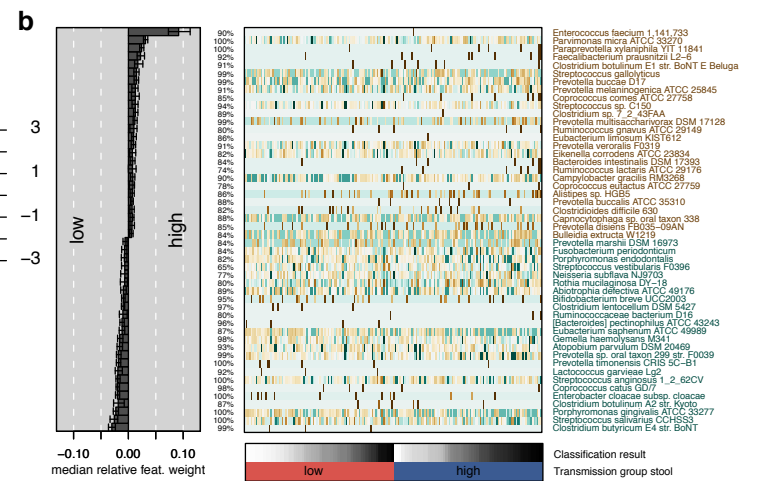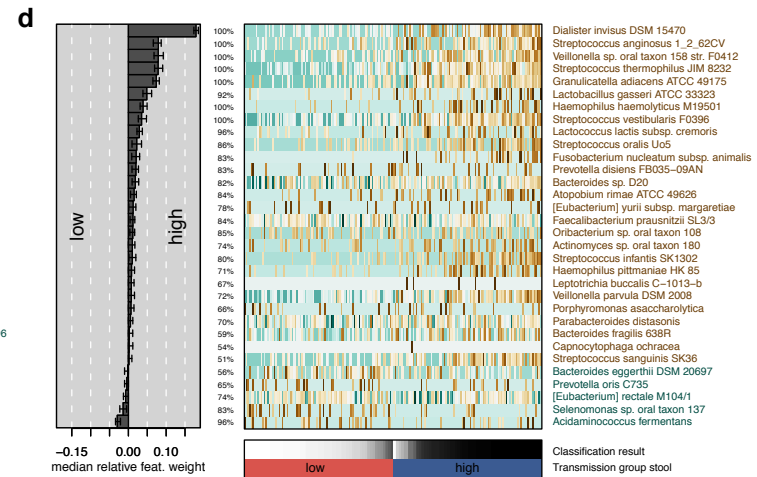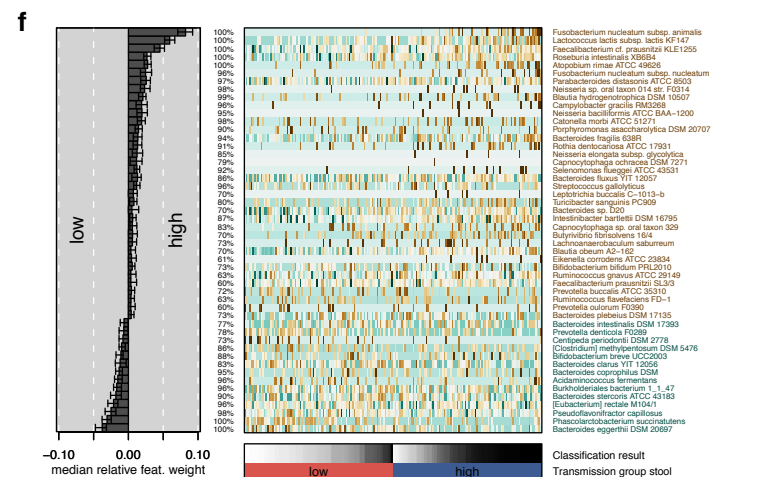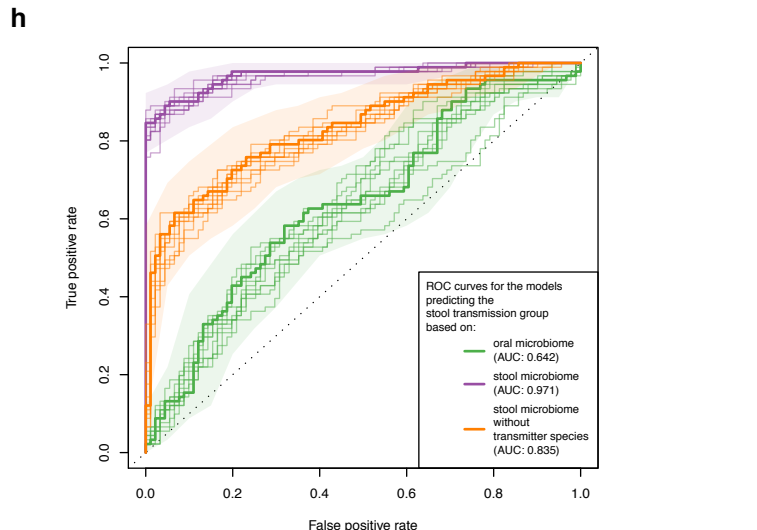

Supplement: supp [file elife_poa_e42693_Figure_3_figure_supplement_1.pdf › elife_poa_e42693_Figure_3_figure_supplement_1.pdf]
