# Supplementary figures and images for: Extensive transmission of microbes along the gastrointestinal tract
Source: eLife journal article supplement (doi:10.7554/elife.42693), 2019-02-11

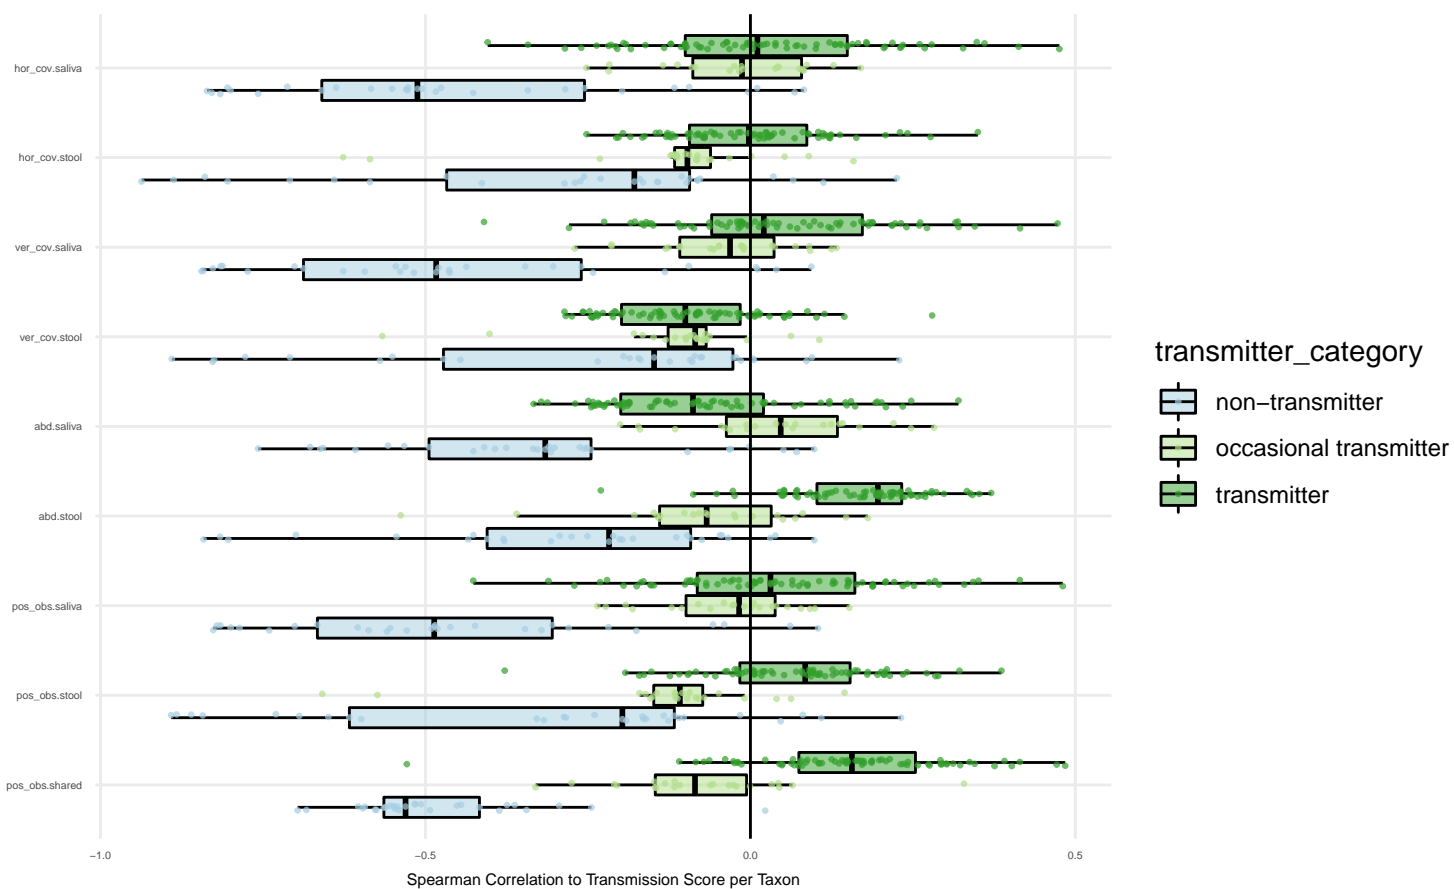

Supplement: supp [file elife_poa_e42693_Figure_2_figure_supplement_2.pdf › elife_poa_e42693_Figure_2_figure_supplement_2.pdf]
